# Supplementary material
Source: publisher site journal article supplement (https://www.dovepress.com/article/351662)
Supplement: Supplementary file 1 [file get_supplementary_file.php]

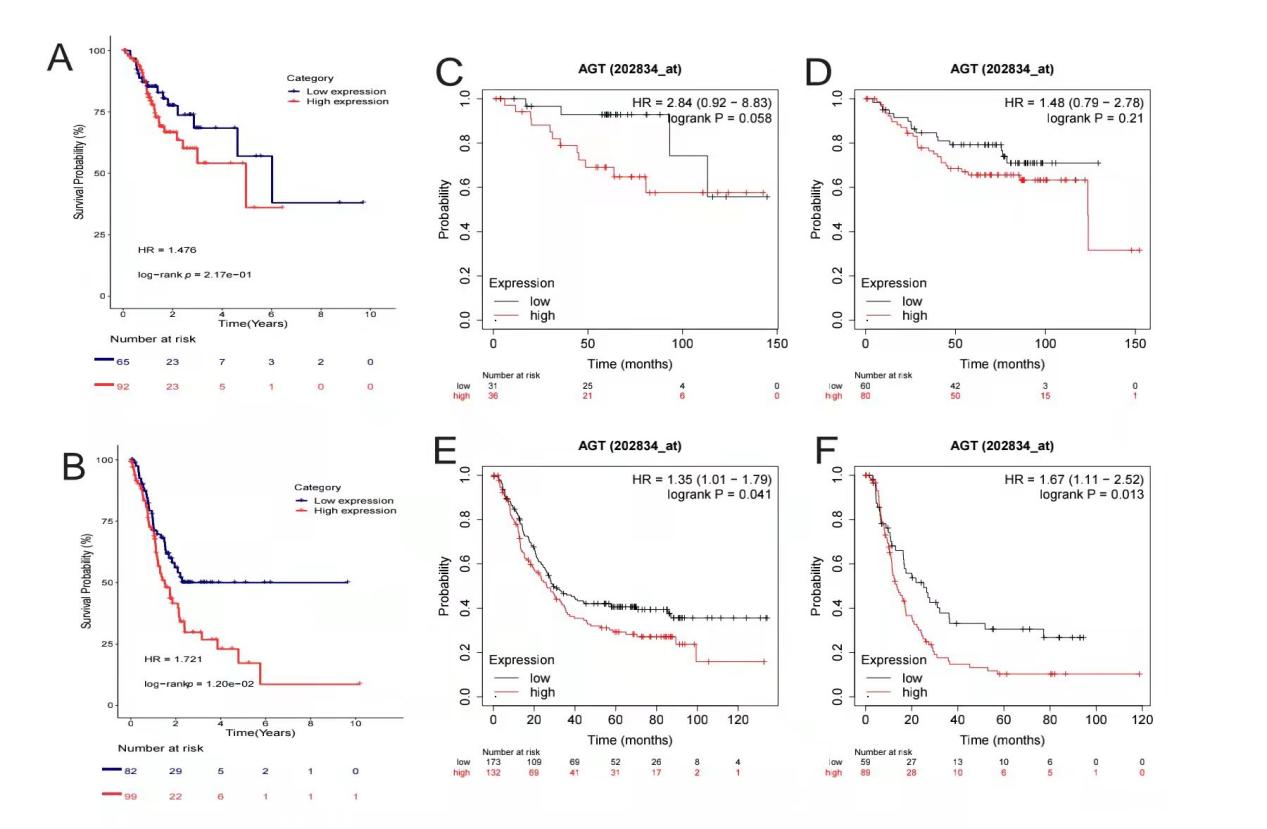


**Figure S1.** Correlation between AGT expression level and OS in GC patients with different TNM stages based on TCGA. (**A**)TNM I/II; (**B**)TNM stage III/IV. The prognostic value of AGT expression in GC patients with different TNM stages in the Kaplan-Meier Plotter. (**C**)TNM I; (**D**)TNM stage II; (**E**)TNM stage III; (**F**)TNM stage IV.

**Abbreviations:** HR, hazard ratio.
